# Supplementary material for: The Transdiagnostic Intervention for Sleep and Circadian Dysfunction (TSC) in Community Mental Health: Evaluating Self-Reported Psychiatric Disorders as a Predictor of Symptoms and Treatment Outcome
Source: Research Square preprint supplement (doi:10.21203/rs.3.rs-7189279/v1), 2025-08-06
Supplement: Supplementary file 1 [file 8abc89f5f00fb7fdd6f6ad8f.pdf]

**The Transdiagnostic Intervention for Sleep and Circadian Dysfunction (TSC) in  
Community Mental Health: Evaluating Self-Reported Psychiatric Disorders as a Predictor  
of Symptoms and Treatment Outcome**

Supplementary Material

Journal name: *Administration and Policy in Mental Health and Mental Health Services Research*

**Supplementary Table 1. Descriptions of Cross-cutting, Core, and Optional Modules Offered for the Standard and Adapted Conditions**

**Cross-cutting modules:** Case formulation, Sleep and circadian education, Motivational enhancement, Goal setting

| Standard                                                                                                                                                               | Adapted                                                           |
|------------------------------------------------------------------------------------------------------------------------------------------------------------------------|-------------------------------------------------------------------|
| <u>Core modules</u>                                                                                                                                                    |                                                                   |
| <i>Core Module 1a:</i> Targets irregular sleep-wake times                                                                                                              | <i>Core Module 1:</i> Targets irregular sleep-wake times          |
| <i>Core Module 1b:</i> Targets difficulty winding down                                                                                                                 | <i>Core Module 2:</i> Targets difficulty winding down             |
| <i>Core Module 1c:</i> Targets difficulty waking up                                                                                                                    | <i>Core Module 3:</i> Targets difficulty waking up                |
| <i>Core Module 2:</i> Aims to reduce daytime impairment                                                                                                                | <i>Core Module 4:</i> Aims to reduce daytime impairment           |
| <i>Core Module 3:</i> Focuses on unhelpful beliefs about sleep                                                                                                         | <i>Core Module 5:</i> Promotes maintenance of change              |
| <i>Core Module 4:</i> Promotes maintenance of change                                                                                                                   | --                                                                |
| <u>Optional modules</u>                                                                                                                                                |                                                                   |
| <i>Optional Module 1:</i> Addresses poor sleep efficiency via stimulus control and sleep restriction                                                                   | <i>Optional Module 1:</i> Focuses on reducing sleep-related worry |
| <i>Optional Module 2:</i> Helps patients reduce time in bed                                                                                                            | --                                                                |
| <i>Optional Module 3:</i> Addresses delayed or advanced phase problems (e.g., going to sleep later than desired or waking up earlier than desired)                     | --                                                                |
| <i>Optional Module 4:</i> Focuses on reducing sleep-related worry                                                                                                      | --                                                                |
| <i>Optional Module 5:</i> Promotes compliance with Continuous Positive Airways Pressure (CPAP) for patients with sleep apnea                                           | --                                                                |
| <i>Optional Module 6:</i> Helps patients negotiate sleep in complicated environments (e.g., noise from bed/roommates, traffic noise, streetlight entering the bedroom) | --                                                                |
| <i>Optional Module 7:</i> Helps patients who experience nightmares                                                                                                     | --                                                                |

**Supplementary Box 1. The steps involved in cleaning and recategorizing patients' initial psychiatric codings for the number of psychiatric disorders (Aims 1-3) and for *broad* psychiatric disorder groups (Aim 4)**

I. Classified patients with self-reported depressive disorders into the unipolar mood features group

- Patients who were initially coded as 1s for depressive disorder(s) or who reported depression *in addition to* bipolar disorder(s) and/or in addition to some other bipolar mood feature (i.e., schizoaffective disorder, bipolar type) were coded as 0s for the unipolar mood features group

II. Classified patients who self-reported psychosis, self-reported a disorder on the schizophrenia spectrum, *and/or* were coded as having psychosis for the “psychosis or not” stratification variable into the psychosis group

III. Classified patients with self-reported bipolar disorders into the bipolar mood features group

- Patients who were initially coded as 1s for depressive disorder(s) or who reported depression *in addition to* bipolar disorder(s) and/or in addition to some other bipolar mood feature (i.e., schizoaffective disorder, bipolar type) were coded as 1s for the bipolar mood features group

IV. Classified patients with self-reported schizoaffective disorder but who so far had not been classified into the unipolar mood features or bipolar mood features group into the unspecified mood features group

V. Corrected remaining inconsistencies across codes and text responses and tabulated number of *total* disorders<sup>a</sup> across *all broad* psychiatric categories (see *Psychiatric Disorder Variables* in the *Methods* section) for each patient for Aim 4 analyses

VI. Subset IDs and data for participants within each *broad* psychiatric category for Aim 4 analyses<sup>b</sup>

Note: <sup>a</sup>In some cases, patients reported more than one disorder within the same *broad* psychiatric category. However, for cases in which one disorder superseded another, both disorders were *not* included and codings and total number of disorders were adjusted accordingly. For example, one individual who reported both “bipolar disorder” and “substance induced manic” was considered to have only one disorder within the bipolar mood features category. <sup>b</sup>Only the five most commonly reported *broad* psychiatric disorder groups were ultimately analyzed for Aim 4. Many patients fell into more than one of these five categories.

**Supplementary Table 2. Pre and Post Means and SDs for the five main outcomes for the Immediate TranS-C and Usual Care-Delayed Treatment conditions**

| Outcome    | Immediate TranS-C (N=253) |             | UC-DT (N=236) |            |
|------------|---------------------------|-------------|---------------|------------|
|            | Pre                       | Post        | Pre           | Post       |
| DSM-5      | 24.9 (8.6)                | 19.6 (10.4) | 24.6 (9.1)    | 23.2 (8.7) |
| Missing    | 7                         | 129         | 1             | 26         |
| PROMIS-SD  | 63.2 (7.2)                | 51.8 (10.6) | 62.9 (7.7)    | 61.8 (8.0) |
| Missing    | 5                         | 128         | 3             | 25         |
| PROMIS-SRI | 62.2 (8.8)                | 52.6 (10.7) | 62.0 (7.7)    | 60.6 (8.2) |
| Missing    | 3                         | 129         | 0             | 25         |
| SHC        | 2.0 (1.4)                 | 3.4 (1.5)   | 2.1 (1.3)     | 2.3 (1.5)  |
| Missing    | 26                        | 133         | 25            | 49         |
| SDS        | 5.2 (2.8)                 | 3.1 (2.7)   | 5.4 (2.7)     | 5.0 (2.8)  |
| Missing    | 1                         | 128         | 0             | 25         |

Note: Means are displayed, followed by SDs in parentheses, for each outcome. Ns represent the number of participants initially assigned to each condition, not accounting for missing responses. DSM-5 = DSM-5 Cross-Cutting Measure; PROMIS-SD = Patient-Reported Outcomes Measurement Information System-Sleep Disturbance; PROMIS-SRI = Patient-Reported Outcomes Measurement Information System-Sleep Related Impairment; SHC = Sleep Health Composite; SDS = The mean of each patient's available responses to the items on the Sheehan Disability Scale.

**Supplementary Table 3. Pre and Post Means and SDs for the five main outcomes for the Adapted TranS-C and Standard TranS-C conditions**

| Outcome    | Adapted (N=340) |             | Standard (N=149) |             |
|------------|-----------------|-------------|------------------|-------------|
|            | Pre             | Post        | Pre              | Post        |
| DSM-5      | 24.8 (8.7)      | 21.9 (9.2)  | 24.7 (9.2)       | 21.8 (10.3) |
| Missing    | 5               | 96          | 3                | 59          |
| PROMIS-SD  | 62.8 (7.6)      | 57.9 (10.4) | 63.6 (7.1)       | 58.7 (10.0) |
| Missing    | 6               | 96          | 2                | 57          |
| PROMIS-SRI | 62.0 (8.2)      | 57.4 (10.3) | 62.3 (8.5)       | 58.4 (8.9)  |
| Missing    | 2               | 96          | 1                | 58          |
| SHC        | 2.1 (1.3)       | 2.8 (1.6)   | 1.9 (1.4)        | 2.6 (1.7)   |
| Missing    | 37              | 115         | 14               | 67          |
| SDS        | 5.4 (2.7)       | 4.1 (2.9)   | 5.2 (2.9)        | 4.7 (2.9)   |
| Missing    | 0               | 96          | 1                | 57          |

Note: Means are displayed, followed by SDs in parentheses, for each outcome. Ns represent the number of participants initially assigned to each condition, not accounting for missing responses. DSM-5 = DSM-5 Cross-Cutting Measure; PROMIS-SD = Patient-Reported Outcomes Measurement Information System-Sleep Disturbance; PROMIS-SRI = Patient-Reported Outcomes Measurement Information System-Sleep Related Impairment; SHC = Sleep Health Composite; SDS = The mean of each patient's available responses to the items on the Sheehan Disability Scale.

**Supplementary Table 4. Usual Care-Delayed Treatment Pre and Post Means and SDs for the five main outcomes in the unipolar mood features, bipolar mood features, anxiety disorders, psychosis, and trauma and stressor-related disorders groups, respectively**

| Outcome    | unipolar (N = 119) |            | bipolar (N = 51) |            | anxiety (N = 148) |            | psychosis (N = 80) |            | trauma (N = 69) |            |
|------------|--------------------|------------|------------------|------------|-------------------|------------|--------------------|------------|-----------------|------------|
|            | Pre                | Post       | Pre              | Post       | Pre               | Post       | Pre                | Post       | Pre             | Post       |
| DSM-5      | 26.1 (8.4)         | 24.2 (8.6) | 25.5 (9.7)       | 24.2 (9.4) | 24.5 (8.7)        | 23.0 (8.6) | 27.5 (9.6)         | 27.7 (9.3) | 26.9 (9.3)      | 23.2 (8.6) |
| Missing    | 1                  | 12         | 0                | 9          | 1                 | 17         | 0                  | 12         | 1               | 7          |
| PROMIS-SD  | 64.0 (7.5)         | 63.2 (7.5) | 62.5 (8.5)       | 61.9 (8.5) | 63.4 (7.2)        | 62.6 (7.3) | 62.4 (8.1)         | 61.1 (9.0) | 64.5 (6.8)      | 62.6 (8.2) |
| Missing    | 2                  | 12         | 0                | 8          | 2                 | 17         | 1                  | 12         | 1               | 8          |
| PROMIS-SRI | 63.4 (7.2)         | 61.8 (7.6) | 61.2 (9.4)       | 60.6 (9.4) | 62.6 (7.8)        | 61.1 (8.1) | 61.3 (8.6)         | 59.3 (9.0) | 63.5 (6.7)      | 61.3 (8.3) |
| Missing    | 0                  | 12         | 0                | 8          | 0                 | 17         | 0                  | 12         | 0               | 8          |
| SHC        | 2.0 (1.4)          | 2.1 (1.4)  | 2.1 (1.4)        | 2.2 (1.4)  | 2.0 (1.3)         | 2.2 (1.3)  | 2.2 (1.2)          | 2.1 (1.5)  | 1.8 (1.3)       | 2.2 (1.6)  |
| Missing    | 9                  | 27         | 8                | 11         | 16                | 32         | 11                 | 18         | 11              | 16         |
| SDS        | 5.9 (2.5)          | 5.4 (2.8)  | 5.3 (2.8)        | 4.4 (2.7)  | 5.6 (2.5)         | 5.2 (2.7)  | 4.9 (2.8)          | 4.8 (2.9)  | 5.7 (2.2)       | 5.3 (2.6)  |
| Missing    | 0                  | 12         | 0                | 8          | 0                 | 17         | 0                  | 12         | 0               | 8          |

Note: Means are displayed, followed by SDs in parentheses, for each outcome in the Usual Care-Delayed Treatment group. Ns represent the number of participants in each psychiatric group, not accounting for missing responses. DSM-5 = DSM-5 Cross-Cutting Measure; PROMIS-SD = Patient-Reported Outcomes Measurement Information System-Sleep Disturbance; PROMIS-SRI = Patient-Reported Outcomes Measurement Information System-Sleep Related Impairment; SHC = Sleep Health Composite; SDS = The mean of each patient's available responses to the items on the Sheehan Disability Scale.

**Supplementary Table 5. Immediate TranS-C Pre and Post Means and SDs for the five main outcomes in the unipolar mood features, bipolar mood features, anxiety disorders, psychosis, and trauma and stressor-related disorders groups, respectively**

| Outcome    | unipolar (N = 132) |             | bipolar (N = 67) |             | anxiety (N = 144) |             | psychosis (N = 86) |             | trauma (N = 74) |             |
|------------|--------------------|-------------|------------------|-------------|-------------------|-------------|--------------------|-------------|-----------------|-------------|
|            | Pre                | Post        | Pre              | Post        | Pre               | Post        | Pre                | Post        | Pre             | Post        |
| DSM-5      | 24.9 (8.4)         | 19.5 (11.3) | 25.9 (9.4)       | 22.6 (10.8) | 26.3 (9.0)        | 20.5 (11.4) | 28.2 (9.3)         | 24.4 (11.3) | 26.7 (8.1)      | 21.8 (8.6)  |
| Missing    | 3                  | 70          | 3                | 36          | 6                 | 70          | 4                  | 42          | 1               | 39          |
| PROMIS-SD  | 62.3 (7.0)         | 52.1 (9.3)  | 65.2 (7.5)       | 51.9 (12.2) | 63.4 (7.2)        | 52.6 (9.8)  | 62.9 (7.4)         | 53.3 (11.0) | 64.8 (5.7)      | 54.2 (9.9)  |
| Missing    | 2                  | 69          | 3                | 36          | 1                 | 70          | 0                  | 41          | 2               | 39          |
| PROMIS-SRI | 62.8 (8.7)         | 52.5 (9.6)  | 63.1 (8.5)       | 53.8 (12.9) | 63.4 (8.7)        | 53.8 (10.8) | 61.5 (8.8)         | 51.9 (12.4) | 63.9 (8.0)      | 54.6 (11.0) |
| Missing    | 2                  | 70          | 1                | 36          | 2                 | 70          | 0                  | 42          | 1               | 39          |
| SHC        | 2.0 (1.4)          | 3.7 (1.6)   | 2.1 (1.4)        | 3.0 (1.7)   | 1.9 (1.3)         | 3.5 (1.6)   | 2.1 (1.4)          | 3.1 (1.4)   | 1.8 (1.3)       | 3.3 (1.7)   |
| Missing    | 10                 | 72          | 10               | 38          | 16                | 73          | 12                 | 42          | 8               | 40          |
| SDS        | 5.1 (2.6)          | 2.9 (2.7)   | 5.7 (2.8)        | 3.2 (2.8)   | 5.6 (2.5)         | 3.3 (2.8)   | 5.2 (2.9)          | 3.4 (3.0)   | 5.6 (2.5)       | 3.7 (2.9)   |
| Missing    | 1                  | 69          | 0                | 36          | 0                 | 70          | 0                  | 41          | 0               | 39          |

Note: Means are displayed, followed by SDs in parentheses, for each outcome in the Immediate TranS-C Treatment group. Ns represent the number of participants in each psychiatric group, not accounting for missing responses. DSM-5 = DSM-5 Cross-Cutting Measure; PROMIS-SD = Patient-Reported Outcomes Measurement Information System-Sleep Disturbance; PROMIS-SRI = Patient-Reported Outcomes Measurement Information System-Sleep Related Impairment; SHC = Sleep Health Composite; SDS = The mean of each patient's available responses to the items on the Sheehan Disability Scale.

**Supplementary Table 6. Fixed effects coefficients (*b*)s, standard errors, and *p*-values associated with Aim 4, after adjusting for covariates**

|                | unipolar |           |                 | bipolar  |           |                 | anxiety  |           |                 | psychosis |           |                 | trauma   |           |                 |
|----------------|----------|-----------|-----------------|----------|-----------|-----------------|----------|-----------|-----------------|-----------|-----------|-----------------|----------|-----------|-----------------|
| <b>Outcome</b> | <i>b</i> | <i>SE</i> | <i>p</i>        | <i>b</i> | <i>SE</i> | <i>p</i>        | <i>b</i> | <i>SE</i> | <i>p</i>        | <i>b</i>  | <i>SE</i> | <i>p</i>        | <i>b</i> | <i>SE</i> | <i>p</i>        |
| DSM-5          | -4.249   | 1.247     | <b>.001</b>     | -1.097   | 1.829     | .549            | -4.253   | 1.125     | <b>&lt;.001</b> | -3.400    | 1.607     | <b>.035</b>     | -0.721   | 1.510     | .633            |
| PROMIS-SD      | -9.657   | 1.276     | <b>&lt;.001</b> | -11.819  | 2.532     | <b>&lt;.001</b> | -9.695   | 1.284     | <b>&lt;.001</b> | -7.845    | 1.777     | <b>&lt;.001</b> | -8.367   | 1.862     | <b>&lt;.001</b> |
| PROMIS-SRI     | -8.736   | 1.494     | <b>&lt;.001</b> | -8.917   | 2.128     | <b>&lt;.001</b> | -8.076   | 1.327     | <b>&lt;.001</b> | -7.623    | 1.898     | <b>&lt;.001</b> | -7.836   | 1.870     | <b>&lt;.001</b> |
| SHC            | 1.717    | 0.286     | <b>&lt;.001</b> | 0.805    | 0.373     | <b>.032</b>     | 1.433    | 0.248     | <b>&lt;.001</b> | 1.117     | 0.297     | <b>&lt;.001</b> | 1.293    | 0.395     | <b>.001</b>     |
| SDS            | -1.808   | 0.425     | <b>&lt;.001</b> | -1.524   | 0.759     | <b>.046</b>     | -1.901   | 0.401     | <b>&lt;.001</b> | -1.951    | 0.581     | <b>.001</b>     | -1.320   | 0.601     | <b>.029</b>     |

Note: The coefficient is the 2-way interaction between time and UC-DT vs. Immediate TSC condition. Non-transformed coefficients are included here for ease of interpretation. The listed SEs and *p*-values are based on robust estimation; the *p*-values listed are not corrected for multiple testing. Small discrepancies across values reported in the main text and Table 5 are due to rounding differences across softwares. unipolar = unipolar mood features; bipolar = bipolar mood features; anxiety = anxiety disorders; trauma = trauma and stressor-related disorders.



**Supplementary Table 7. The number of patients with each possible combination of two broad disorder categories**

|                   | <b>ndd</b> | <b>psych</b> | <b>anx</b> | <b>ocd</b> | <b>trauma</b> | <b>diss</b> | <b>pd</b> | <b>ed</b> | <b>sud</b> | <b>bipmood</b> | <b>unimood</b> | <b>unspec mood</b> |
|-------------------|------------|--------------|------------|------------|---------------|-------------|-----------|-----------|------------|----------------|----------------|--------------------|
| <b>ndd</b>        | <b>58</b>  | 15           | 36         | 8          | 18            | 1           | 5         | 0         | 3          | 14             | 29             | 1                  |
| <b>psych</b>      | 15         | <b>166</b>   | 78         | 7          | 39            | 4           | 3         | 2         | 3          | 44             | 65             | 10                 |
| <b>anx</b>        | 36         | 78           | <b>292</b> | 16         | 88            | 5           | 12        | 2         | 3          | 61             | 177            | 2                  |
| <b>ocd</b>        | 8          | 7            | 16         | <b>21</b>  | 11            | 4           | 2         | 2         | 0          | 5              | 11             | 0                  |
| <b>trauma</b>     | 18         | 39           | 88         | 11         | <b>143</b>    | 5           | 4         | 2         | 2          | 37             | 67             | 0                  |
| <b>diss</b>       | 1          | 4            | 5          | 4          | 5             | <b>6</b>    | 0         | 2         | 0          | 2              | 1              | 0                  |
| <b>pd</b>         | 5          | 3            | 12         | 2          | 4             | 0           | <b>16</b> | 0         | 0          | 8              | 5              | 0                  |
| <b>ed</b>         | 0          | 2            | 2          | 2          | 2             | 2           | 0         | <b>4</b>  | 0          | 1              | 2              | 0                  |
| <b>sud</b>        | 3          | 3            | 3          | 0          | 2             | 0           | 0         | 0         | <b>11</b>  | 1              | 4              | 0                  |
| <b>bipmood</b>    | 14         | 44           | 61         | 5          | 37            | 2           | 8         | 1         | 1          | <b>118</b>     | 0              | 0                  |
| <b>unimood</b>    | 29         | 65           | 177        | 11         | 67            | 1           | 5         | 2         | 4          | 0              | <b>251</b>     | 0                  |
| <b>unspecmood</b> | 1          | 10           | 2          | 0          | 0             | 0           | 0         | 0         | 0          | 0              | 0              | <b>10</b>          |

Note: The bolded diagonals represent the total number of cases for the disorder category in question. ndd = neurodevelopmental disorders; psych = psychosis; anx = anxiety disorders; ocd = obsessive-compulsive and related disorders; trauma = trauma and stressor-related disorders; diss = dissociative disorders; pd = personality disorders; ed = feeding and eating disorders; sud = substance-related and addictive disorders<sup>a</sup>; bipmood = bipolar mood features; unimood = unipolar mood features; unspecmood = unspecified mood features.

<sup>a</sup>The low prevalence of sud was likely the result of the study criterion that excluded patients who had substance abuse/dependence if it made participation in the study unfeasible.
